# Supplementary material for: CNV Detection from Circulating Tumor DNA in Late Stage Non-Small Cell Lung Cancer Patients
Source: PubMed Central journal article supplement (PMC6895974; doi:10.3390/genes10110926), 2019-11-14
Supplement: genes-10-00926-s001.pdf [file genes-10-00926-s001.pdf]

### Overall sensitivity and specificity for ctDNA calling

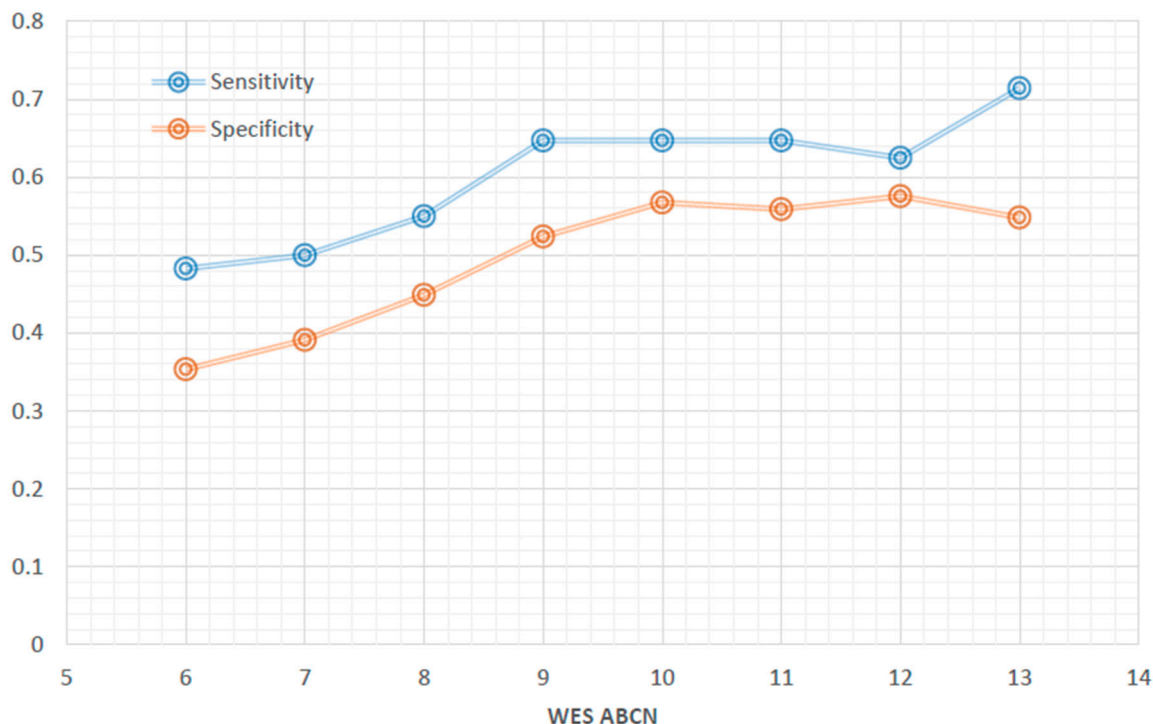

**Figure S1.** The total sensitivity and specificity curve for absolute copy number based on different WES absolute copy number gain cut-off from 6 to 13.

**Table S1.** Patient demographic and clinical characteristics of the 48 paired sample cohort.

| Sample_ID  | Gender | Age | TNM  | Tumor sampling date | Blood sampling date | Tumor sample type | Tumor percentage |
|------------|--------|-----|------|---------------------|---------------------|-------------------|------------------|
| 10528S01   | Male   | 69  | IV   | 13-Oct-2017         | 17-Oct-2017         | Biopsy            | 0.7              |
| 10763S01   | Male   | 64  | IIIb | 26-Oct-2017         | 26-Oct-2017         | Biopsy            | 0.3              |
| 10839S02   | Male   | 54  | IV   | 23-Oct-2017         | 31-Oct-2017         | Biopsy            | 0.25             |
| 11455S01X1 | Male   | 80  | IV   | 21-Nov-2017         | 24-Nov-2017         | Biopsy            | 0.3              |
| 11590S01X1 | Male   | 61  | IV   | 21-Nov-2017         | 30-Nov-2017         | Biopsy            | 0.2              |
| 12328S01   | Male   | 67  | IV   | 21-Dec-2017         | 25-Dec-2017         | Biopsy            | 0.3              |
| 12426S01   | Male   | 63  | IV   | 27-Dec-2017         | 2-Jan-2018          | Biopsy            | 0.75             |
| 12972S02   | Male   | 69  | IV   | 24-Jan-2018         | 23-Jan-2018         | Biopsy            | 0.5              |
| ct10416S01 | Female | 57  | IV   | 19-Aug-2016         | 19-Aug-2016         | Biopsy            | 0.8              |
| ct10423S01 | Male   | 58  | IV   | 11-Aug-2016         | 16-Aug-2016         | Biopsy            | 0.5              |
| ct10444S01 | Female | 46  | IV   | 18-Jul-2016         | 18-Jul-2016         | Biopsy            | 0.7              |
| ct20004S01 | Female | 68  | IV   | 16-Jun-2016         | 21-Jun-2016         | Biopsy            | 0.3              |
| ct20119S01 | Male   | 75  | IV   | 6-Jul-2016          | 7-Jul-2016          | Biopsy            | 0.6              |
| ct20145S01 | Female | 67  | IV   | 17-Aug-2016         | 17-Aug-2016         | Biopsy            | 0.8              |
| ct20164S01 | Male   | 61  | IIIb | 6-Sep-2016          | 9-Sep-2016          | Biopsy            | 0.8              |
| ct20183S01 | Female | 67  | IV   | 6-Jul-2016          | 5-Jul-2016          | Thoracoscopy      | 0.5              |
| ct20232S01 | Female | 53  | IV   | 4-Jul-2016          | 4-Jul-2016          | Biopsy            | 0.3              |
| ct20236S01 | Female | 57  | IIIb | 22-Jul-2016         | 29-Jul-2016         | Biopsy            | 0.8              |
| ct20237S01 | Female | 69  | IIIb | 13-Jul-2016         | 13-Jul-2016         | Biopsy            | 0.4              |

|            |        |    |      |             |             |                            |      |
|------------|--------|----|------|-------------|-------------|----------------------------|------|
| ct20239S01 | Male   | 26 | IV   | 1-Jul-2016  | 1-Jul-2016  | Biopsy                     | 0.75 |
| ct20241S01 | Male   | 55 | IIIb | 7-Jul-2016  | 7-Jul-2016  | Biopsy                     | 0.4  |
| ct20246S01 | Female | 61 | IV   | 13-Jul-2016 | 12-Jul-2016 | Surgery                    | 0.4  |
| ct20247S01 | Male   | 83 | IV   | 1-Sep-2016  | 9-Sep-2016  | Biopsy                     | 0.7  |
| ct20262S01 | Male   | 77 | IIIb | 8-Aug-2016  | 11-Aug-2016 | Biopsy                     | 0.6  |
| ct20280S01 | Female | 56 | IIIB | 22-Jul-2016 | 22-Jul-2016 | Biopsy                     | 0.3  |
| ct20295S01 | Female | 52 | IV   | 18-Jul-2016 | 18-Jul-2016 | Biopsy                     | 0.4  |
| ct20299S01 | Male   | 62 | IIIb | 1-Jul-2016  | 5-Jul-2016  | Biopsy                     | 0.7  |
| ct20320S01 | Female | 57 | IV   | 4-Aug-2016  | 9-Aug-2016  | Biopsy                     | 0.3  |
| ct20394S01 | Female | 50 | IV   | 30-Aug-2016 | 31-Aug-2016 | Biopsy                     | 0.3  |
| ct20395S01 | Female | 27 | IV   | 15-Aug-2016 | 25-Aug-2016 | Biopsy                     | 0.2  |
| ct20401S01 | Male   | 68 | IV   | 2-Sep-2016  | 2-Sep-2016  | Biopsy                     | 0.4  |
| ct20402S01 | Female | 77 | IIIB | 4-Sep-2016  | 1-Sep-2016  | Surgery                    | 0.5  |
| ct20410S01 | Male   | 74 | IV   | 1-Sep-2016  | 12-Sep-2016 | Biopsy                     | 0.4  |
| ct20414S01 | Male   | 65 | IV   | 14-Sep-2016 | 14-Sep-2016 | Fiberoptic<br>bronchoscopy | 0.4  |
| ct20416S01 | Male   | 59 | IV   | 20-Sep-2016 | 20-Sep-2016 | Biopsy                     | 0.4  |
| 101S01     | Male   | 62 | IV   | 12-Feb-2015 | 25-Feb-2015 | Biopsy                     | 0.8  |
| 103S01     | Male   | 32 | IV   | 17-Sep-2015 | 28-Sep-2015 | Biopsy                     | 0.9  |
| 108S01     | Male   | 73 | IV   | 10-Jun-2015 | 21-Jun-2015 | Biopsy                     | 0.3  |
| 109S01     | Male   | 74 | IV   | 27-Jul-2015 | 4-Aug-2015  | Biopsy                     | 0.2  |
| 110S01     | Male   | 52 | IV   | 20-Jul-2015 | 16-Jul-2015 | Surgery                    | 0.2  |
| 118S01     | Male   | 65 | IV   | 13-Aug-2015 | 13-Aug-2015 | Biopsy                     | 0.3  |
| 122S01     | Male   | 52 | IV   | 18-Dec-2015 | 18-Dec-2015 | Unknown                    | 0.6  |
| 127S01     | Male   | 54 | IV   | 10-Oct-2015 | 16-Oct-2015 | Biopsy                     | 0.6  |
| 129S01     | Male   | 52 | IV   | 30-Nov-2015 | 11-Dec-2015 | Biopsy                     | 0.4  |
| 132S01     | Male   | 56 | IV   | 21-May-2015 | 28-May-2015 | Biopsy                     | 0.7  |
| 134S01     | Male   | 50 | IV   | 2-Jul-2015  | 9-Jul-2015  | Biopsy                     | 0.5  |
| 135S01     | Male   | 39 | IV   | 22-Jul-2015 | 24-Jul-2015 | Biopsy                     | 0.5  |
| 138S01     | Male   | 43 | IV   | 16-Jul-2015 | 16-Jul-2015 | Surgery                    | 0.85 |
